# Supplementary material
Source: ML conference proceedings conference paper supplement (https://openreview.net/forum?id=vecFROHnL4)
Supplement: supplementary_material [file attachment]

This file introduce the file in the supplementary file for MARVEL: Multidimensional Abstraction and Reasoning through Visual Evaluation and Learning [paper id 1595]

1. **Supplementary.pdf** contains the dataset documentation, intended use and link to data page as well as croissant metadata.
2. Folder **marvel\_inference** contains file for running model evaluations. **run.py** contains code for evaluating open-source models and **run\_api.py** contains code for evaluating closed-source models.
